# Supplementary material for: Expression and ERG regulation of PIM kinases in prostate cancer
Source: PubMed Central journal article supplement (PMC8124112; doi:10.1002/cam4.3893), 2021-05-01
Supplement: CAM4-10-3427-s002.pdf [file CAM4-10-3427-s002.pdf]

# Supplementary Figure S1.

Primary PCa

ERG

+

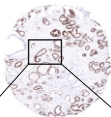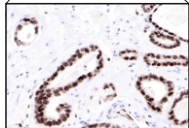

-

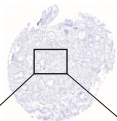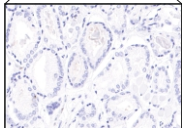

50  $\mu$ m
