# Supplementary material for: Expression and ERG regulation of PIM kinases in prostate cancer
Source: PubMed Central journal article supplement (PMC8124112; doi:10.1002/cam4.3893), 2021-05-01

## Supplementary Figure S3

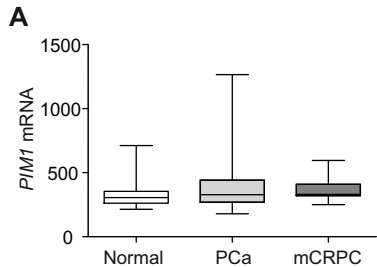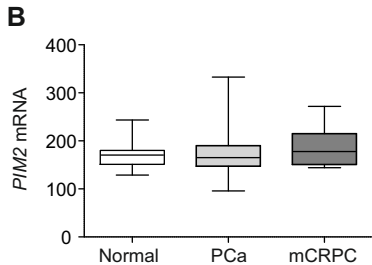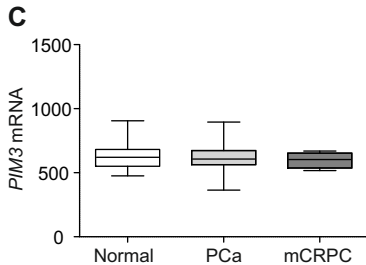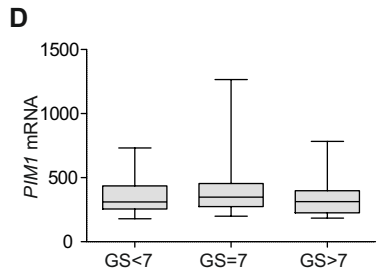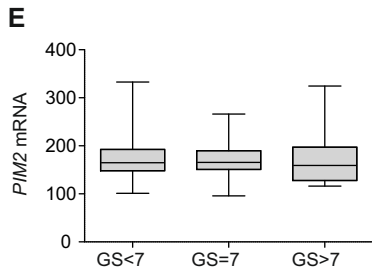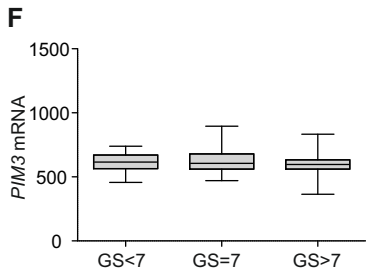

Supplement: CAM4-10-3427-s008.pdf [file CAM4-10-3427-s008.pdf]
